# Supplementary material
Source: PubMed Central journal article supplement (PMC8166151)
Supplement: pnas.2100021118.sapp.pdf [file pnas.2100021118.sapp.pdf]

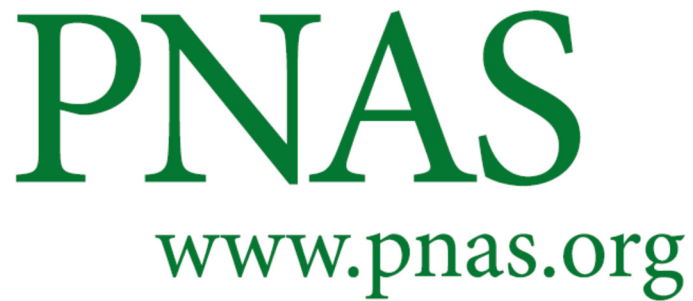

**Supplementary Information for**  
Reconstitution of  $\beta$ -adrenergic regulation of Cav1.2: Rad-dependent and  
Rad-independent protein kinase A mechanisms.

Moshe Katz<sup>1</sup>, Suraj Subramaniam<sup>2</sup>, Orna Chomsky-Hecht<sup>2</sup>, Vladimir Tsemakhovich<sup>1</sup>, Veit Flockerzi<sup>4</sup>, Enno Klusmann<sup>5</sup>, Joel A. Hirsch<sup>2,3</sup>, Sharon Weiss<sup>1</sup>, Nathan Dascal<sup>\*1,3</sup>

\* Correspondence to: Nathan Dascal, School of Medicine, Tel Aviv University, Ramat Aviv, Tel Aviv 6997801, Israel. **Email:** [dascaln@tauex.tau.ac.il](mailto:dascaln@tauex.tau.ac.il)

**This PDF file includes:**

SI Methods

Figures S1 to S5

SI References

## SI Methods

### ***Experimental animals and ethical approval***

Experiments were approved by Tel Aviv University Institutional Animal Care and Use Committee (IACUC permits # 01-16-104 and 01-20-083). Female frogs were maintained at  $20\pm 2^{\circ}\text{C}$  on 10 h light/14 h dark cycle. Frogs were anaesthetized in 0.2% tricaine methanesulfonate (MS-222), and portions of ovary were removed through an incision on the abdomen. The incision was sutured, and the animal was held in a separate tank until it had fully recovered from the anesthesia, and afterwards was returned to a separate tank for post-operational animals. The animals did not show any signs of post-operational distress and were allowed to recover for at least 3 months until the next surgery. Following the final collection of oocytes (or the 4<sup>th</sup> surgery as defined by the IACUC rules), anaesthetized frogs were sacrificed by decapitation and double pithing.

### ***DNA constructs and RNA and purified proteins***

The cDNA constructs used are: Human Rad (NP\_001122322), cardiac long-N terminus isoform of rabbit  $\alpha_{1C}$  (GenBank: X15539) and the corresponding mouse  $\alpha_{1C}$  isoform (NM\_001255999.2), rabbit  $\text{Ca}_v\beta_{2b}$  (originally termed  $\beta_{2a}$  (1); GenBank: X64297.1;  $\text{Ca}_v\beta_{2N4}$  according to the comprehensive nomenclature (2)),  $\alpha_{2\delta 1}$  (GenBank: M21948). DNA mutations have been introduced using standard PCR-based procedures and verified by sequencing of the coding region of the cDNA. cDNAs of rabbit and mouse  $\alpha_{1C}\Delta 821$ , in which distal C terminus is truncated, were prepared by the removal of the cDNA segment encoding the dCT from the plasmid and introducing a stop codon after valine 1821. Rabbit  $\alpha_{1C}\Delta 20\Delta 1821$  was prepared by deletion of the first 20 amino acids of the LNT of  $\alpha_{1C}\Delta 1821$ . The short-NT forms of  $\alpha_{1C}$ , with and without the insertion of exon 9\*-encoded segment of loop L1, were prepared on the template of rabbit WT  $\alpha_{1C}$  (3, 4). Rabbit  $\alpha_{1C}$  constructs were in pGEM-GSB or pGEM-HJ vectors containing the 5' and 3' untranslated regions of *Xenopus*  $\beta$ -globin (5), except  $\alpha_{1C}\text{S1928A}$  that was in pSP72 (6). The latter construct produced small  $I_{Ba}$  in oocytes; only cells with  $I_{Ba}>150$  nA were used for analysis. The DNA of the distal C-terminal fragment (dCT) of rabbit  $\alpha_{1C}$  encoded a.a. 1821-2171 (8). Two NT mutants of mouse  $\alpha_{1C}$  were constructed:  $\alpha_{1C}\text{NT-4A}\Delta 1821$ , with alanine substitution of a.a. 2-4; and  $\alpha_{1C}\text{NT-TYP}\Delta 1821$ , with alanine substitution of amino acids T<sub>10</sub>, Y<sub>13</sub> and P<sub>15</sub>. Mouse  $\alpha_{1C}$  constructs were inserted into pMXT vector, and contained the double mutation T1066Y/Q1070M which renders the channel dihydropyridine-insensitive, but does not affect regulation by PKA (7). The  $\beta_{2b}$ -core construct was prepared by deletion of the first 25 amino acids in the N-terminus of  $\text{Ca}_v\beta_{2b}$ , deletion of amino acids 423-606 in the C-terminus

and removing the linker amino acids 138-202 by PCR (9) (residues numbering according to Opatowsky et al. (10)).  $\beta_{2b}$ -3DA was prepared by introducing 3 point mutations (D244A/D320A/D322A) by PCR using standard site-directed mutagenesis to  $\beta_{2b}$  in which amino acids 423-606 were removed like in  $\beta_{2b}$ -core but the N-terminus and the linker were intact (see Fig. 2A). For technical reasons the C-terminus was extended by adding 17 a.a., GCGSGSGSGSGSGSGPR after a.a. 422. Human CFTR channel (NM\_00492) was in pSP64 vector; we note that this cDNA had an extra serine in position 264, which did not affect the channel's function. Human  $\beta_2$  adrenergic receptor (GenBank: AAA88015.1) was subcloned into pGEM-HJ vector. Mouse  $\beta_1$ -AR (NP\_031445.2) was in pcDNA3.1 vector. For comparison with  $\beta_2$ -AR, it was subcloned into pGEM-HJ vector. All other cDNA constructs used for RNA synthesis were inserted into pGEM-GSB or pGEM-HJ vectors, all of which contain 5' and 3' UTR from *Xenopus*  $\beta$ -globin.

The RNAs were prepared using a standard procedure (8). Cav1.2 was expressed in *Xenopus* oocytes, usually in full subunit composition  $\alpha_{1C}+\alpha_{2\delta}+\beta_{2b}$ , by injection of equal amounts, by weight, of RNAs of each subunit (except experiments of Fig. 2 that addressed the role of the Cav $\beta$  subunit). We used the long-NT isoform of rabbit  $\alpha_{1C}$  (except Fig. S2 where mouse  $\alpha_{1C}$  was used) and various mutants, as detailed in the figures. The amount of injected RNA, per oocyte, for full-length  $\alpha_{1C}$  was 1.8-5 ng. For  $\alpha_{1C}\Delta 1821$  constructs, the injected RNA amounts were: 1-1.5 ng for  $\alpha_{1C}\Delta 1821$ ,  $\alpha_{1C}\Delta 20\Delta 1821$  0.6 ng,  $\alpha_{1C}$ NT-4A $\Delta 1821$  and  $\alpha_{1C}$ NT-TYP $\Delta 1821$  3 ng. When Cav $\beta$  was not expressed, we injected 5 ng RNA of  $\alpha_{1C}\Delta 1821$  and  $\alpha_{2\delta 1}$ . Rad RNA was injected in Rad: $\beta_{2b}$  ratio of 1:3-1:1. RNA of  $\beta_1$ -AR was injected at 5 ng/oocyte if produced on the template of pcDNA vector, or 0.005-0.2 ng when the DNA was cloned into pGEM-HJ.  $\beta_2$ -AR was in pGEM-HJ and 0.005-0.2 ng RNA/oocyte were injected. For titration purpose we injected even higher doses (0.5-5 ng), however they decreased the viability of the oocytes and their tolerance to electrode penetration.

His-tagged catalytic-subunit of PKA (His-PKA-CS, GenBank: NM 008854.5) and His-tagged human protein kinase inhibitor protein (PKI) (GenBank: S76965.1) were purified from *E. coli* as described (8), with minor modifications for His-PKA-CS. For details, see SI Methods. PKI was stored and injected into oocytes in PKI buffer (in mM: 20 Tris-HCl, 300 NaCl, 2 DTT, pH 8). His-PKA-CS was stored and injected in PKA buffer (in mM: 20 KH<sub>2</sub>PO<sub>4</sub>, 20 KCl, 2 DTT, pH 7.5) (8).

### **Purification of recombinant His-tagged catalytic subunit of PKA**

His-tagged catalytic subunit of PKA (His-PKA-CS, GenBank: NM 008854.5) was purified from the *E. coli* strain BL21. Cells were grown in YT medium containing 100  $\mu$ g/ml ampicillin and 36  $\mu$ g/ml chloramphenicol at 37°C to an optical density at 600 nm of 0.5-0.8, induced with 1 mM IPTG and grown

for an additional 12h at 16° C, collected by centrifugation, and stored frozen. Cells from 1500 ml of culture were resuspended in 40-ml lysis buffer (50 mM sodium phosphate, 100 mM NaCl, 20 mM Tris-HCl, 5 mM  $\beta$  mercaptoethanol ( $\beta$ -ME), pH 8.0) and protease-inhibitor cocktail tablet (Roche), 2 mM phenylmethylsulfonyl fluoride (PMSF) and lysed in a microfluidizer. Thereafter, cells were centrifuged at 17,000 rpm at 4°C for 30 minutes. The lysate was applied to the Ni-NTA agarose column (2 ml/min). Samples were taken from lysate and flow-through. Then washing was carried out in wash buffer: 50 mM  $\text{KH}_2\text{PO}_4$ , 20 mM Tris-HCl (pH 8), 100 mM NaCl, 10 mM imidazole, 5 mM  $\beta$ -ME. Then elution step was carried out with 40 ml of elution buffer: 250 mM imidazole, 50 mM  $\text{KH}_2\text{PO}_4$ , 20 mM Tris-HCl (pH 8), 100 mM NaCl+ 5 mM  $\beta$ -ME. The eluate was concentrated with Centricon 10 kDa to 5 ml and added to 80 ml gel-filtration buffer (20 mM Mops (pH 8), 100 mM KCl, 5 mM  $\beta$ -ME) and purified on a Superdex G-75 column, subdivided into 4-5  $\mu\text{l}$  aliquots (5 $\mu\text{g}/\mu\text{l}$ ) and stored at -80°C.

## SI Figures

**Fig. S1.**

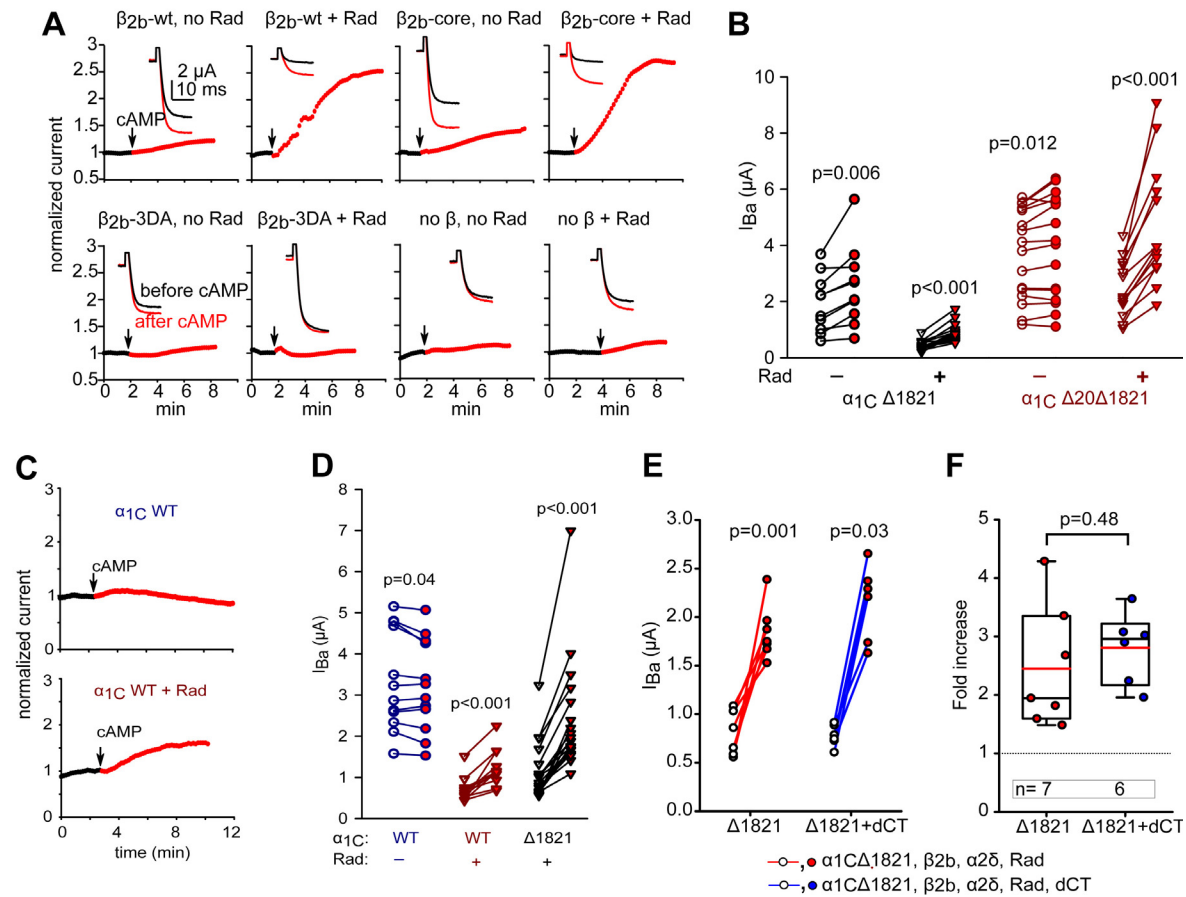

**Figure S1. Separation of Rad-dependent and Rad-independent PKA regulation of  $\alpha_{1c}$ : the roles of Cav $\beta$ , N terminus, and the distal C terminus.** **A**, The role of Cav $\beta$ . A full set of representative diary plots of cAMP-induced changes in  $I_{Ba}$  following injection of cAMP (extension of Fig. 2B). Oocytes expressed  $\alpha_{1c}\Delta 1821$ ,  $\alpha_{2\delta}$ , and the indicated variant of  $\beta_{2b}$  (or no  $\beta$  at all), with or without Rad. Insets show current records at +20 mV before (black trace) and 10 min after cAMP injection (red trace). **B**, The role of N-terminal initial segment of  $\alpha_{1c}$ . "Before-after" plots of cAMP-induced changes in  $I_{Ba}$  in individual cells expressing Cav1.2 containing  $\alpha_{1c}\Delta 1821$  (black) and  $\alpha_{1c}\Delta 20\Delta 1821$  (dark red; the latter is lacking the first 20 a.a. of the N-terminus).  $\alpha_{2\delta}$  and  $\beta_{2b}$  were co-expressed in all cases, without or with Rad (circles and inverted triangles, respectively). N=3 experiments; statistics: paired t-test. For summary of fold increase in these experiments see Fig. 2E. **C,D**, comparison of WT (full-length)  $\alpha_{1c}$  and dCT-truncated  $\alpha_{1c}\Delta 1821$ . For summary of fold increase in  $I_{Ba}$  in these experiments, see Fig. 2F. **C**, Diary plots of cAMP-induced changes in  $I_{Ba}$  in representative cells expressing the full length  $\alpha_{1c}$  ( $\alpha_{1c}$  WT),  $\alpha_{2\delta}$  and  $\beta_{2b}$ , without Rad (upper panel) or with Rad (lower panel). **D**, "before-after" plots of cAMP-induced changes in  $I_{Ba}$  in individual cells expressing wt- $\alpha_{1c}$  with or without Rad co-expression, or  $\alpha_{1c}\Delta 1821$  and Rad.  $\alpha_{2\delta}$  and  $\beta_{2b}$  were present in all cases. Rad: $\beta_{2b}$  RNA ratio was 1:2 or 1:1. Statistics: paired t-test. N=3 experiments. **E, F**, The clipped distal CT of  $\alpha_{1c}$  does not alter Rad-dependent cAMP regulation of  $\alpha_{1c}\Delta 1821$ . **E**, "before-after" plots of cAMP induced changes in  $I_{Ba}$  in individual cells co-expressing Cav1.2- $\alpha_{1c}\Delta 1821$  and Rad, with or without the dCT (a.a. 1821-2171) expressed as a separate protein (8). N=1 experiment; statistics: paired t-test (no dCT), Wilcoxon Signed Rank Test (with dCT). **F**, Fold increase in  $I_{Ba}$  induced by cAMP injection. 1 experiment; statistics: t-test.

**Fig. S2.**

**Figure S2. Mutations within the initial segment of long-NT disrupt Rad-independent cAMP regulation**

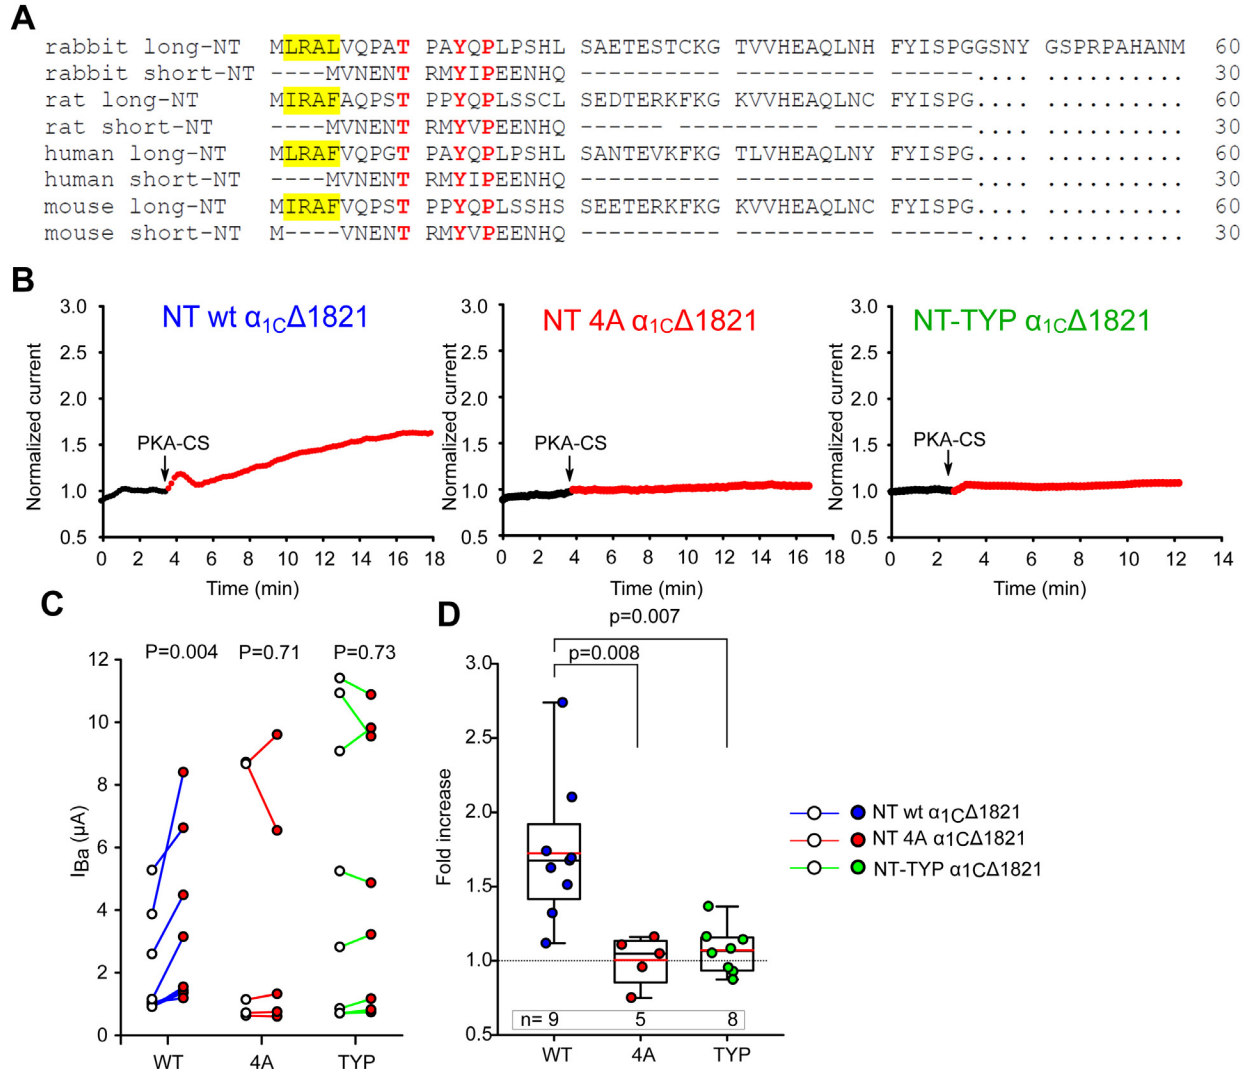

**of Cav1.2- $\alpha_{1C}\Delta 1821$ .** **A**, Amino acid sequences of the NH<sub>2</sub>-terminal part of long-NT and short-NT isoforms of rabbit, rat, human and mouse  $\alpha_{1C}$ . Amino acids in positions T<sub>10</sub>, Y<sub>13</sub> and P<sub>15</sub> (TYP motif, marked in red) are conserved in all isoforms. The four a.a. (2-5) of the long-NT isoform mutated to alanine in the NT 4A  $\alpha_{1C}\Delta 1821$  mutant are highlighted in yellow. The fully conserved a.a. sequence encoded by exon 2 (starting with GSNY) is denoted by dots. **B**, Representative diary plots of normalized Ba<sup>2+</sup> current at 20 mV. Figure show the time course of change in I<sub>Ba</sub> following the intracellular injection of 21 ng PKA catalytic subunit (PKA-CS, red trace). The channel was expressed in *Xenopus* oocytes in full subunit composition:  $\alpha_{1C}\Delta 1821$  (3 ng RNA),  $\beta_{2b}$  (3 ng),  $\alpha_{2\delta}$  (3 ng). In the left panel, the oocytes expressed mouse  $\alpha_{1C}\Delta 1821$  (NT wt  $\alpha_{1C}\Delta 1821$ ). In the middle and right panels, mRNAs of mouse  $\alpha_{1C}\Delta 1821$  with alanine substitution of amino acids 2-5 (NT 4A  $\alpha_{1C}\Delta 1821$ ) and the TYP motif (NT-TYP  $\alpha_{1C}\Delta 1821$ ) were used, respectively. **C**, "before-after" plots of PKA-CS induced changes in I<sub>Ba</sub> in individual cells. N=3 experiments; statistics: paired t-test. **D**, Fold increase in I<sub>Ba</sub> induced by 21 ng PKA-CS. N=3; statistics: p=0.002, Kruskal-Wallis One Way ANOVA on Ranks followed by Dunnett's test.

**Fig. S3.**

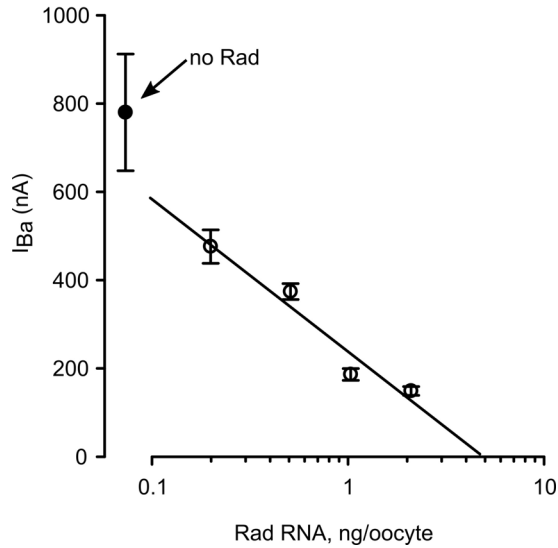

**Figure S3. Inverse correlation between Rad concentration and barium currents in  $\beta$ 1-AR regulation of Cav1.2- $\alpha$ 1cwt.** Rad reduces the  $Ba^{2+}$  current of Cav1.2- $\alpha$ 1cwt in a dose-dependent manner. The channel was expressed in full subunit composition:  $\alpha$ 1cwt (5 ng RNA),  $\beta$ 2b (5 ng),  $\alpha$ 2 $\delta$  (5 ng).  $I_{Ba}$  decreased with increasing doses of Rad RNA (Pearson correlation,  $r=-0.85$ ,  $p=0.002$ ). Each point presents mean $\pm$ SEM from 4 to 10 oocytes (N=1 experiment, all oocytes from the same batch and day of recording). The linear regression line was drawn for non-zero doses of Rad.

**Fig. S4**

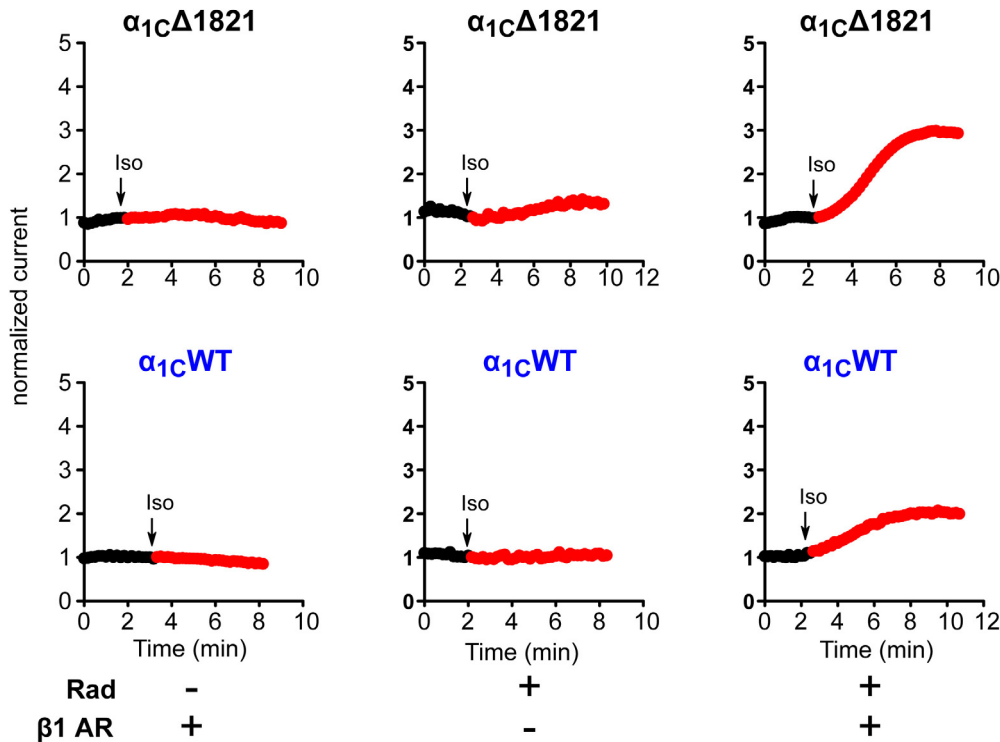

**Figure S4.  $\beta$ 1-AR regulation of full-length and truncated  $\alpha$ 1c.** Representative diary plots of  $I_{Ba}$  in oocytes expressing wt (full-length)  $\alpha$ 1c (Cav1.2- $\alpha$ 1c) or Cav1.2- $\alpha$ 1c $\Delta$ 1821 channels (lower and upper panels, respectively) with or without Rad and  $\beta$ 1-AR, and the response to 50  $\mu$ M Iso.  $\beta$ 2b and  $\alpha$ 2 $\delta$  were coexpressed in all cases. For Summaries, see Fig. 4.

**Fig. S5**

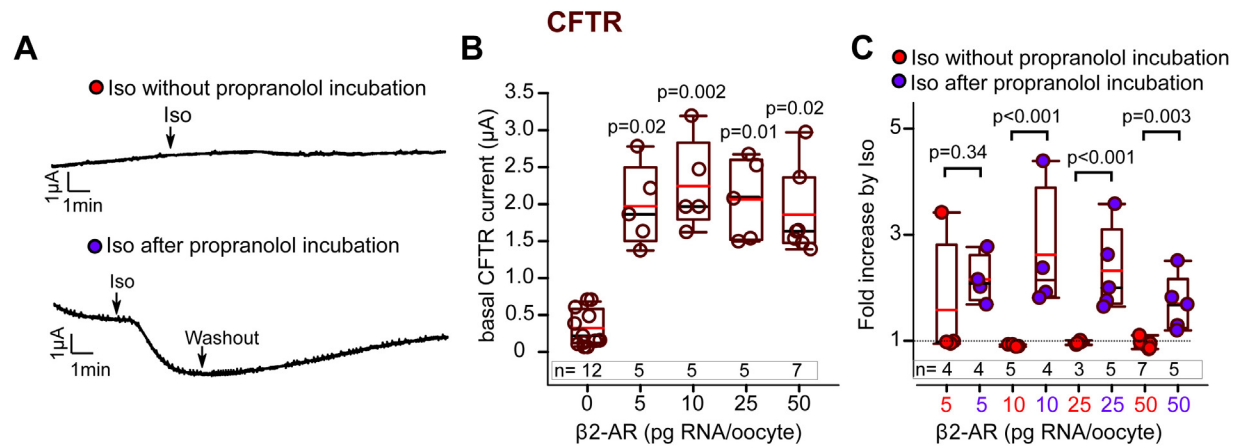

**Figure S5. Reconstitution of  $\beta$ 2-AR regulation of CFTR.** **A**, Representative records in oocytes expressing CFTR and  $\beta$ 2-AR. CFTR chloride currents were recorded at -80 mV. Upper panel: without propranolol preincubation; lower panel: with 10  $\mu$ M propranolol preincubation for 60-120 min. Oocytes were perfused with propranolol-free solution for about 2 min prior to the addition of 50  $\mu$ M Iso. **B**, Basal chloride currents in oocytes co-expressing CFTR channel (1 ng RNA/oocyte) and  $\beta$ 2-AR (increasing doses of RNA, as indicated). Oocytes expressing CFTR alone had significantly lower basal currents than oocytes co-expressing  $\beta$ 2-AR (N=1 experiment; Kruskal-Wallis One Way ANOVA on Ranks,  $H = 22.1$ ,  $p < 0.001$ ). **C**, Fold change in chloride current by Iso. The plot compares the effects of 50  $\mu$ M Iso in oocytes injected with the indicated doses of  $\beta$ 2-AR RNA, without (red symbols) or with (purple symbols) propranolol preincubation. N=1 experiment. Statistics: Mann-Whitney Rank Sum Tests.

## SI references

1. R. Hullin *et al.*, Calcium channel  $\beta$  subunit heterogeneity: functional expression of cloned cDNA from heart, aorta and brain. *EMBO J* **11**, 885-890 (1992).
2. F. Hofmann, V. Flockerzi, S. Kahl, J. W. Wegener, L-type  $\text{Ca}_v1.2$  calcium channels: from in vitro findings to in vivo function. *Physiol Rev* **94**, 303-326 (2014).
3. N. Kanevsky, N. Dascal, Regulation of maximal open probability is a separable function of  $\text{Ca}_v\beta$  subunit in L-type  $\text{Ca}^{2+}$  channel, dependent on  $\text{NH}_2$  terminus of  $\alpha_{1C}$  ( $\text{Ca}_v1.2\alpha$ ). *J Gen Physiol* **128**, 15-36 (2006).
4. S. Weiss *et al.*, Modulation of distinct isoforms of L-type calcium channels by  $\text{G}_q$ -coupled receptors in *Xenopus* oocytes: Antagonistic effects of  $\text{G}\beta\gamma$  and protein kinase C. *Channels* **6**, 426-437 (2012).
5. E. Shistik, T. Ivanina, Y. Blumenstein, N. Dascal, Crucial role of N terminus in function of cardiac L-type  $\text{Ca}^{2+}$  channel and its modulation by protein kinase C. *J Biol Chem* **273**, 17901-17909 (1998).
6. T. Perets, Y. Blumenstein, E. Shistik, I. Lotan, N. Dascal, A potential site of functional modulation by protein kinase A in the cardiac  $\text{Ca}^{2+}$  channel  $\alpha_{1C}$  subunit. *FEBS Lett* **384**, 189-192 (1996).
7. L. Yang *et al.*,  $\beta$ -adrenergic regulation of the L-type  $\text{Ca}^{2+}$  channel does not require phosphorylation of  $\alpha_{1C}$  Ser1700. *Circ Res* **113**, 871-880 (2013).
8. S. Oz *et al.*, Protein kinase A regulates C-terminally truncated  $\text{Ca}_v1.2$  in *Xenopus* oocytes: roles of N- and C-termini of the  $\alpha_{1C}$  subunit. *J Physiol* **595**, 3181-3202 (2017).
9. Y. Opatowsky, O. Chomsky-Hecht, M. G. Kang, K. P. Campbell, J. A. Hirsch, The voltage-dependent calcium channel  $\beta$  subunit contains two stable interacting domains. *J Biol Chem* **278**, 52323-52332 (2003).
10. Y. Opatowsky, C. C. Chen, K. P. Campbell, J. A. Hirsch, Structural analysis of the voltage-dependent calcium channel  $\beta$  subunit functional core and its complex with the  $\alpha_1$  interaction domain. *Neuron* **42**, 387-399 (2004).
